# Supplementary material for: Aetiology, secondary prevention strategies and outcomes of ischaemic stroke despite oral anticoagulant therapy in patients with atrial fibrillation
Source: PubMed Central journal article supplement — J Neurol Neurosurg Psychiatry. 2022 Apr 8;93(6):588–98. doi: 10.1136/jnnp-2021-328391 (PMC9148984; doi:10.1136/jnnp-2021-328391), 2022-04-08
Supplement: jnnp-2021-328391supp001.pdf [file jnnp-2021-328391supp001.pdf]

Polymeris, Meinel et al.

Stroke despite anticoagulation

Supplementary material

## **Etiology, secondary prevention strategies and outcomes of ischemic stroke despite oral anticoagulant therapy in patients with atrial fibrillation**

Polymeris, Meinel et al.

### **Supplementary material**

#### **Contents**

|                                                                                                                                                                                               |    |
|-----------------------------------------------------------------------------------------------------------------------------------------------------------------------------------------------|----|
| <b>Supplementary methods</b> .....                                                                                                                                                            | 2  |
| <b>Study design, patient population, and data collection</b> .....                                                                                                                            | 2  |
| <b>Statistical Analyses</b> .....                                                                                                                                                             | 3  |
| <b>Supplementary Figure 1.</b> Distribution of stroke etiologies in the total study population and stratified to type of anticoagulant and study period at the time of the index stroke. .... | 5  |
| <b>Supplementary Table 1.</b> Participating stroke centers, their contribution to the pooled dataset and complete list of collaborators .....                                                 | 6  |
| <b>Supplementary Table 2.</b> Patient characteristics stratified to type of anticoagulant (DOAC vs. VKA) at the time of stroke.....                                                           | 7  |
| <b>Supplementary Table 3.</b> Preventive treatments after index stroke stratified to stroke etiology .....                                                                                    | 8  |
| <b>Supplementary Table 4.</b> Association of preventive strategies after index stroke with the combined endpoint of recurrent ischemic stroke and intracranial hemorrhage .....               | 9  |
| <b>References</b> .....                                                                                                                                                                       | 10 |

## Supplementary methods

### Study design, patient population, and data collection

#### *Baseline clinical, neuroimaging and laboratory variables*

We collected the following baseline variables: age; sex; risk factors defined in accordance with previous research,<sup>1 2</sup> including history of prior ischemic stroke, intracranial hemorrhage, ischemic heart disease, hypertension, diabetes mellitus, dyslipidemia, current smoking, renal impairment (defined as glomerular filtration rate <50ml/min using the creatinine-based Chronic-Kidney-Disease-Epidemiology-Collaboration equation), as well as history of bioprosthetic heart valve replacement, stenosis  $\geq 50\%$  or  $< 50\%$  in arteries supplying the territory in which the index stroke occurred (hereafter referred to as ipsilateral stenosis), active malignancy, and prestroke modified Rankin Scale (mRS); medication details at the time of the index stroke, including the type of anticoagulant, i.e., DOAC (apixaban, dabigatran, edoxaban, or rivaroxaban with their respective dosing and frequency of daily intake) or VKA (acenocoumarol, fluindione, phenprocoumon, or warfarin), as well as use of antiplatelets, statins, or antihypertensives at stroke onset; stroke characteristics, including the National Institutes of Health Stroke Scale (NIHSS) on admission, presence of large vessel occlusion (LVO), acute treatment with intravenous thrombolysis or mechanical thrombectomy, infarct pattern classified as embolic (i.e., presence of LVO, cortical infarct, or other patterns<sup>3</sup>) vs. nonembolic (i.e., lacunar<sup>4</sup>) as in prior research,<sup>5</sup> as well as discharge outcome on the mRS; and laboratory data, including the international normalized ratio (INR) and DOAC-specific plasma level at the time of the stroke.

#### *Preventive treatments*

We collected the following information on preventive treatments after the index stroke: use of anticoagulants (including type and dosing), antiplatelets (either alone or as add-on therapy to anticoagulation), statins, and antihypertensives at hospital discharge. Furthermore, we collected information on revascularization treatments for symptomatic ipsilateral stenosis (such as carotid endarterectomy or stenting) and nonpharmacologic prevention strategies for AF (left atrial appendage occlusion) after the index stroke.

## Statistical Analyses

### *Secondary analyses: Association of preventive strategies with the endpoints*

To explore the association of preventive strategies with the primary and secondary endpoints, we fitted univariable and multivariable logistic models adjusted for preselected common outcome predictors (i.e., age, sex, hypertension, diabetes, ischemic heart disease, dyslipidemia, renal impairment, prior ischemic stroke or ICH, current smoking, active malignancy, and use of statins or antihypertensives after stroke) with the following preventive strategies after index stroke as an independent variable:

(i) for all patients:

- use of DOAC (versus VKA). For this, we fitted all models twice, with and without the type of anticoagulant (DOAC vs. VKA) at the time of the index stroke and an interaction term anticoagulant type before\*after.
- any anticoagulant switch (including VKA to DOAC, DOAC to VKA, and DOAC to another DOAC)
- new addition of antiplatelets to anticoagulants after index stroke

(ii) for patients treated with DOAC at the time of the stroke:

- switch to another DOAC
- switch to DOAC with different dosing frequency (once to twice daily or vice versa)
- switch to DOAC with different mechanism of action (thrombin to factor Xa inhibitor or vice versa)

(iii) for patients treated with VKA at the time of the stroke:

- switch from VKA to any DOAC

(iv) for patients with competing mechanism as stroke etiology:

- new addition of antiplatelets to anticoagulants after stroke

(v) for patients with insufficient anticoagulation as stroke etiology:

- DOAC dose correction (i.e., switch from reduced to full dose) or switch from VKA to DOAC after stroke

(vi) for patients with cardioembolism despite sufficient anticoagulation as stroke etiology:

- use of twice-daily DOAC (vs. any other anticoagulant) after stroke

Polymeris, Meinel et al.

Stroke despite anticoagulation

Supplementary material

We limited these analyses to patients for whom follow-up data were available and to those receiving oral anticoagulant therapy after the index stroke (excluding patients with antiplatelet monotherapy, parenteral anticoagulation, or no antithrombotic treatment).

Polymeris, Meinel et al.

Stroke despite anticoagulation

Supplementary material

**Supplementary Figure 1.** Distribution of stroke etiologies in the total study population and stratified to type of anticoagulant and study period at the time of the index stroke. While the distribution of DOAC vs. VKA differed between the two study periods January 2012 to June 2016 vs. July 2016 to December 2020 ( $p < 0.001$ ), the distribution of stroke etiologies did not differ substantially ( $p = 0.08$ ).

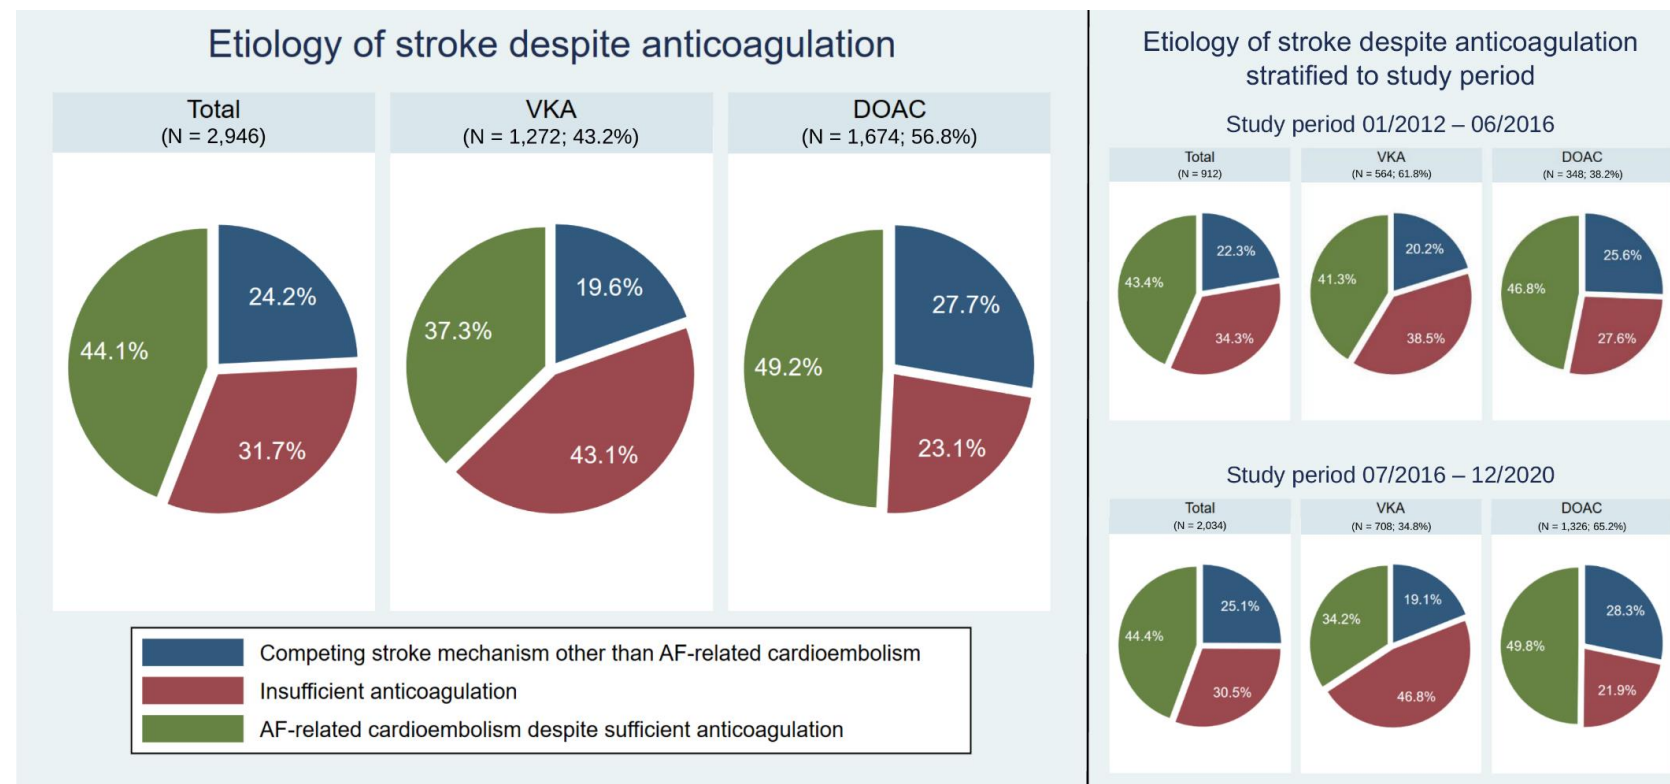

VKA, vitamin K antagonist; DOAC, direct oral anticoagulant; AF, atrial fibrillation

Polymeris, Meinel et al.

Stroke despite anticoagulation

Supplementary material

**Supplementary Table 1.** Participating stroke centers, their contribution to the pooled dataset and complete list of collaborators

| Stroke Center                     | Reporting period                       | Number of patients contributed to the analyzed pooled dataset | Complete list of collaborators                                                                                                                                                                                                                                                                                                          |
|-----------------------------------|----------------------------------------|---------------------------------------------------------------|-----------------------------------------------------------------------------------------------------------------------------------------------------------------------------------------------------------------------------------------------------------------------------------------------------------------------------------------|
| Basel, Switzerland                | 04/2012 – 12/2020                      | 460                                                           | Stefan T Engelter, Philippe A Lyrer, Leo H Bonati, Christopher Traenka, Alexandros A Polymeris, Annaelle Zietz, Lilian Kriemler, Nils Peters, Gian Marco De Marchis, Sebastian Thilemann, Henrik Gensicke, Lisa Hert, Benjamin Wagner, Fabian Schaub, Louisa Meya, Nikolaos Symeon Avramiotis, Joachim Fladt, Tolga Dittrich, Urs Fisch |
| Berlin, Germany                   | 01/2013 – 12/2015<br>01/2018 – 12/2019 | 438                                                           | Jan F Scheitz, Christian H Nolte, Karl Georg Haeusler, Simon Hellwig, Markus G Klammer, Simon Litmeier                                                                                                                                                                                                                                  |
| Bern, Switzerland                 | 02/2015 – 07/2020                      | 456                                                           | Thomas R Meinel, Urs Fischer, David J Seiffge, Lorenz Grunder, Marcel Arnold, Simon Jung, Jan Gralla                                                                                                                                                                                                                                    |
| Brown University, USA             | 01/2018 – 12/2019                      | 50                                                            | Christoph Stretz, Shadi Yaghi, Xing (Cathy) Dai                                                                                                                                                                                                                                                                                         |
| Erlangen, Germany                 | 04/2016 – 12/2018                      | 334                                                           | Svenja Stoll, Ruihao Wang, Bernd Kallmünzer                                                                                                                                                                                                                                                                                             |
| George Washington University, USA | 02/2016 – 12/2019                      | 34                                                            | Christopher R. Leon Guerrero, Iman Moeini-Naghani                                                                                                                                                                                                                                                                                       |
| Heidelberg, Germany               | 01/2015 – 06/2018                      | 339                                                           | Hannah Oehler, Kyra Hoelscher, Peter Ringleb, Jan C Purrucker                                                                                                                                                                                                                                                                           |
| Lausanne, Switzerland             | 01/2012 – 06/2020                      | 293                                                           | Patrik Michel, Davide Strambo, Alexander Salerno                                                                                                                                                                                                                                                                                        |
| Lugano, Switzerland               | 02/2014 – 08/2020                      | 159                                                           | Giovanni Bianco, Carlo W Cereda                                                                                                                                                                                                                                                                                                         |
| Mainz, Germany                    | 09/2019 – 06/2020                      | 87                                                            | Timo Uphaus, Klaus Gröschel                                                                                                                                                                                                                                                                                                             |
| Zurich, Switzerland               | 01/2014 – 08/2020                      | 296                                                           | Mira Katan, Susanne Wegener                                                                                                                                                                                                                                                                                                             |
| Total                             | 01/2012 – 12/2020                      | 2,946                                                         |                                                                                                                                                                                                                                                                                                                                         |

Polymeris, Meinel et al.

Stroke despite anticoagulation

Supplementary material

**Supplementary Table 2.** Patient characteristics stratified to type of anticoagulant (DOAC vs. VKA) at the time of stroke

| Characteristic                                           | All<br>(N=2,946) | N<br>missing     | VKA<br>(N=1,272) | DOAC<br>(N=1,674) | p value |
|----------------------------------------------------------|------------------|------------------|------------------|-------------------|---------|
| <b>Demographics</b>                                      |                  |                  |                  |                   |         |
| age, median (IQR), years                                 | 81 (76-86)       | 0                | 82 (76.85-86)    | 80.75 (75-86)     | <0.001  |
| female sex, N (%)                                        | 1,404 (47.7%)    | 0                | 624 (49.1%)      | 780 (46.6%)       | 0.190   |
| <b>Risk factors</b>                                      |                  |                  |                  |                   |         |
| hypertension, N (%)                                      | 2,649 (89.9%)    | 0                | 1,149 (90.3%)    | 1,500 (89.6%)     | 0.520   |
| diabetes, N (%)                                          | 871 (29.6%)      | 0                | 362 (28.5%)      | 509 (30.4%)       | 0.250   |
| dyslipidemia, N (%)                                      | 1,768 (60.3%)    | 13               | 791 (62.3%)      | 977 (58.7%)       | 0.047   |
| renal impairment, N (%)                                  | 959 (33.2%)      | 58               | 457 (36.7%)      | 502 (30.5%)       | <0.001  |
| prior ischemic stroke, N (%)                             | 984 (33.4%)      | 0                | 373 (29.3%)      | 611 (36.5%)       | <0.001  |
| history of ICH, N (%)                                    | 60 (2.0%)        | 0                | 17 (1.3%)        | 43 (2.6%)         | 0.019   |
| ischemic heart disease, N (%)                            | 905 (30.7%)      | 0                | 406 (31.9%)      | 499 (29.8%)       | 0.220   |
| bioprosthetic heart valve, N (%)                         | 151 (5.1%)       | 0                | 68 (5.3%)        | 83 (5.0%)         | 0.640   |
| current smoking, N (%)                                   | 249 (8.8%)       | 103              | 97 (7.9%)        | 152 (9.4%)        | 0.170   |
| active malignancy, N (%)                                 | 236 (8.1%)       | 15               | 79 (6.2%)        | 157 (9.4%)        | 0.002   |
| prestroke mRS $\geq 3$ , N (%)                           | 567 (22.1%)      | 381*             | 253 (23.4%)      | 314 (21.2%)       | 0.180   |
| ipsilateral stenosis $\geq 50\%$ , N (%)                 | 452 (15.6%)      | 54               | 181 (14.6%)      | 271 (16.4%)       | 0.170   |
| ipsilateral stenosis $< 50\%$ , N (%)                    | 496 (17.1%)      | 50               | 235 (18.8%)      | 261 (15.8%)       | 0.036   |
| <b>Medication details before stroke</b>                  |                  |                  |                  |                   |         |
| additional antiplatelet, N (%)                           | 363 (12.3%)      | 4                | 162 (12.8%)      | 201 (12.0%)       | 0.540   |
| statin, N (%)                                            | 1,354 (46.4%)    | 30               | 561 (44.8%)      | 793 (47.7%)       | 0.120   |
| antihypertensive(s), N (%)                               | 2,683 (91.9%)    | 27               | 1,160 (92.4%)    | 1,523 (91.5%)     | 0.380   |
| <b>Stroke details</b>                                    |                  |                  |                  |                   |         |
| Etiology                                                 |                  | 0                |                  |                   |         |
| competing mechanism, N (%)                               | 713 (24.2%)      |                  | 249 (19.6%)      | 464 (27.7%)       | <0.001  |
| insufficient anticoagulation, N (%)                      | 934 (31.7%)      |                  | 548 (43.1%)      | 386 (23.1%)       |         |
| cardioembolism despite sufficient anticoagulation, N (%) | 1,299 (44.1%)    |                  | 475 (37.3%)      | 824 (49.2%)       |         |
| NIHSS on admission, median (IQR)                         | 6 (2-14)         | 33               | 7 (3-15)         | 5 (2-13)          | <0.001  |
| intravenous thrombolysis, N (%)                          | 351 (11.9%)      | 2                | 227 (17.8%)      | 124 (7.4%)        | <0.001  |
| endovascular treatment, N (%)                            | 787 (26.8%)      | 6                | 340 (26.8%)      | 447 (26.8%)       | 1.000   |
| embolic infarct pattern, N (%)                           | 2,317 (81.7%)    | 111              | 1,036 (84.6%)    | 1,281 (79.6%)     | <0.001  |
| large vessel occlusion, N (%)                            | 1,345 (46.2%)    | 32               | 628 (50.4%)      | 717 (43.0%)       | <0.001  |
| <b>Laboratory parameters on admission</b>                |                  |                  |                  |                   |         |
| INR, median (IQR)                                        | 1.4 (1.1-1.9)    | 100              | 1.8 (1.5-2.31)   | 1.2 (1.08-1.35)   | <0.001  |
| low anticoagulant activity, N (%) <sup>‡</sup>           | 957 (43.9%)      | 766 <sup>‡</sup> | 737 (58.2%)      | 220 (24.1%)       | <0.001  |
| <b>Outcome at discharge</b>                              |                  |                  |                  |                   |         |
| mRS $\geq 3$ , N (%)                                     | 1,543 (63.3%)    | 508 <sup>§</sup> | 691 (64.5%)      | 852 (62.4%)       | 0.290   |
| in-hospital death, N (%)                                 | 204 (8.4%)       |                  | 104 (9.7%)       | 100 (7.3%)        | 0.035   |

\* not collected in the center Berlin for the recruiting period 2013-2015

† not collected in the center Erlangen

‡ defined in VKA-treated patients as INR  $< 2.0$  and in DOAC-treated patients as plasma level  $< 30\text{ng/ml}$ . DOAC plasma level not collected in the centers Berlin, Mainz, and George Washington University.

§ not collected in the center Mainz

VKA, Vitamin K antagonist; DOAC, direct oral anticoagulant; ICH, intracranial hemorrhage; NIHSS, National Institutes of Health Stroke Scale; INR, international normalized ratio; mRS, modified Rankin Scale

Polymeris, Meinel et al.

Stroke despite anticoagulation

Supplementary material

**Supplementary Table 3.** Preventive treatments after index stroke stratified to stroke etiology

|                                             | All<br>(N=2,946) | N<br>missing       | Stroke etiology                   |                                            |                                                                      | p value |
|---------------------------------------------|------------------|--------------------|-----------------------------------|--------------------------------------------|----------------------------------------------------------------------|---------|
|                                             |                  |                    | Competing<br>mechanism<br>(N=713) | Insufficient<br>anticoagulation<br>(N=934) | Cardioembolism<br>despite sufficient<br>anticoagulation<br>(N=1,299) |         |
| <b>Treatments</b>                           |                  |                    |                                   |                                            |                                                                      |         |
| <b>Antithrombotic treatment</b>             |                  |                    |                                   |                                            |                                                                      |         |
| oral anticoagulant monotherapy, N (%)       | 2,070 (72.0%)    | 71                 | 404 (57.8%)                       | 666 (73.1%)                                | 1,000 (79.1%)                                                        | <0.001  |
| oral anticoagulant and antiplatelets, N (%) | 367 (12.8%)      |                    | 198 (28.3%)                       | 71 (7.8%)                                  | 98 (7.7%)                                                            |         |
| antiplatelets monotherapy, N (%)            | 120 (4.2%)       |                    | 28 (4.0%)                         | 49 (5.4%)                                  | 43 (3.4%)                                                            |         |
| parenteral anticoagulation, N (%)           | 32 (1.1%)        |                    | 12 (1.7%)                         | 10 (1.1%)                                  | 10 (0.8%)                                                            |         |
| no treatment, N (%)                         | 286 (9.9%)       |                    | 57 (8.2%)                         | 115 (12.6%)                                | 114 (9.0%)                                                           |         |
| <b>Type of anticoagulant</b>                |                  |                    |                                   |                                            |                                                                      |         |
| VKA, N (%)                                  | 315 (13.4%)      | 80                 | 92 (15.7%)                        | 95 (13.1%)                                 | 128 (12.2%)                                                          | 0.140   |
| DOAC, N (%)                                 | 2,042 (86.6%)    |                    | 495 (84.3%)                       | 630 (86.9%)                                | 917 (87.8%)                                                          |         |
| <b>DOAC dose</b>                            |                  |                    |                                   |                                            |                                                                      |         |
| full, N (%)                                 | 1,228 (66.6%)    | 199*               | 289 (63.4%)                       | 362 (66.2%)                                | 577 (68.7%)                                                          | 0.150   |
| reduced, N (%)                              | 615 (33.4%)      |                    | 167 (36.6%)                       | 185 (33.8%)                                | 263 (31.3%)                                                          |         |
| <b>DOAC dosing frequency</b>                |                  |                    |                                   |                                            |                                                                      |         |
| once daily, N (%)                           | 393 (19.5%)      | 23                 | 124 (25.3%)                       | 145 (23.5%)                                | 124 (13.6%)                                                          | <0.001  |
| twice daily, N (%)                          | 1,626 (80.5%)    |                    | 367 (74.7%)                       | 472 (76.5%)                                | 787 (86.4%)                                                          |         |
| <b>DOAC mechanism of action</b>             |                  |                    |                                   |                                            |                                                                      |         |
| thrombin inhibitor, N (%)                   | 486 (24.1%)      | 23                 | 108 (22.0%)                       | 123 (19.9%)                                | 255 (28.0%)                                                          | <0.001  |
| factor Xa inhibitor, N (%)                  | 1,533 (75.9%)    |                    | 383 (78.0%)                       | 494 (80.1%)                                | 656 (72.0%)                                                          |         |
| <b>Other pharmacologic treatments</b>       |                  |                    |                                   |                                            |                                                                      |         |
| statins, N (%)                              | 2,126 (75.1%)    | 115                | 555 (81.3%)                       | 643 (71.2%)                                | 928 (74.5%)                                                          | <0.001  |
| antihypertensives, N (%)                    | 2,401 (84.8%)    | 116                | 592 (86.7%)                       | 745 (82.5%)                                | 1,064 (85.5%)                                                        | 0.048   |
| <b>Nonpharmacologic treatments</b>          |                  |                    |                                   |                                            |                                                                      |         |
| revascularisation treatments, N (%)         | 94 (3.4%)        | 172 <sup>†</sup>   | 89 (13.2%)                        | 1 (0.1%)                                   | 4 (0.3%)                                                             | <0.001  |
| left atrial appendage occlusion, N (%)      | 17 (1.0%)        | 1,184 <sup>‡</sup> | 9 (1.9%)                          | 2 (0.4%)                                   | 6 (0.8%)                                                             | 0.045   |

\* not collected in the center Lausanne

<sup>†</sup> not collected in the center Mainz<sup>‡</sup> not collected in the centers Berlin, Heidelberg, Lausanne and Mainz

VKA, Vitamin K antagonist; DOAC, direct oral anticoagulant



Polymeris, Meinel et al.

Stroke despite anticoagulation

Supplementary material

**Supplementary Table 4.** Association of preventive strategies after index stroke with the combined endpoint of recurrent ischemic stroke and intracranial hemorrhage

| Patients                                                        | Preventive strategy                               | Combined endpoint of recurrent ischemic stroke and ICH |            |                                   |                      |            |                                   |
|-----------------------------------------------------------------|---------------------------------------------------|--------------------------------------------------------|------------|-----------------------------------|----------------------|------------|-----------------------------------|
|                                                                 |                                                   | unadjusted                                             |            |                                   | adjusted*            |            |                                   |
|                                                                 |                                                   | OR<br>[95%-CI]                                         | p<br>value | N events /<br>total N in<br>model | aOR<br>[95%-CI]      | p<br>value | N events /<br>total N in<br>model |
| all patients                                                    | use of DOAC (vs. VKA) after stroke                | 0.50<br>[0.29, 0.84]                                   | 0.009      | 80/1,489                          | 0.41<br>[0.23, 0.72] | 0.002      | 72/1,368                          |
|                                                                 | any anticoagulant switch                          | 0.83<br>[0.53, 1.31]                                   | 0.425      | 80/1,489                          | 0.77<br>[0.47, 1.25] | 0.286      | 72/1,368                          |
|                                                                 | addition of antiplatelets                         | 2.33<br>[1.33, 4.08]                                   | 0.003      | 80/1,505                          | 2.61<br>[1.43, 4.76] | 0.002      | 72/1,382                          |
| patients with DOAC at the time of the stroke                    | switch to another DOAC                            | 1.30<br>[0.71, 2.40]                                   | 0.398      | 45/826                            | 1.28<br>[0.65, 2.51] | 0.472      | 39/757                            |
|                                                                 | switch to DOAC with different dosing frequency    | 1.08<br>[0.57, 2.03]                                   | 0.820      | 41/794                            | 1.05<br>[0.52, 2.14] | 0.888      | 35/725                            |
|                                                                 | switch to DOAC with different mechanism of action | 1.65<br>[0.86, 3.19]                                   | 0.133      | 41/795                            | 1.47<br>[0.70, 3.11] | 0.307      | 35/726                            |
| patients with VKA at the time of the stroke                     | switch to any DOAC                                | 0.45<br>[0.23, 0.90]                                   | 0.023      | 35/663                            | 0.45<br>[0.21, 0.99] | 0.046      | 33/611                            |
| patients with competing stroke mechanism                        | addition of antiplatelets                         | 1.82<br>[0.86, 3.84]                                   | 0.118      | 33/409                            | 2.22<br>[0.96, 5.12] | 0.061      | 29/359                            |
| patients with insufficient anticoagulation                      | switch to DOAC or correct DOAC dose               | 0.81<br>[0.33, 1.95]                                   | 0.634      | 21/480                            | 0.87<br>[0.33, 2.25] | 0.770      | 20/402                            |
| patients with cardioembolism despite sufficient anticoagulation | twice-daily DOAC (vs. any other anticoagulant)    | 1.45<br>[0.54, 3.94]                                   | 0.464      | 25/592                            | 1.36<br>[0.45, 4.08] | 0.586      | 22/555                            |

\*adjusted for age, sex, hypertension, diabetes, ischemic heart disease, dyslipidemia, renal impairment, prior ischemic stroke, ICH, current smoking, active malignancy, use of statins, use of antihypertensives

VKA, Vitamin K antagonist; DOAC, direct oral anticoagulant; ICH, intracranial hemorrhage

Polymeris, Meinel et al.

Stroke despite anticoagulation

Supplementary material

**References**

1. Seiffge DJ, De Marchis GM, Koga M, et al. Ischemic Stroke despite Oral Anticoagulant Therapy in Patients with Atrial Fibrillation. *Ann Neurol* 2020 doi: 10.1002/ana.25700 [published Online First: 2020/02/14]
2. Seiffge DJ, Paciaroni M, Wilson D, et al. Direct oral anticoagulants versus vitamin K antagonists after recent ischemic stroke in patients with atrial fibrillation. *Ann Neurol* 2019;85(6):823-34. doi: 10.1002/ana.25489 [published Online First: 2019/04/14]
3. Maier IL, Schregel K, Karch A, et al. Association between Embolic Stroke Patterns, ESUS Etiology, and New Diagnosis of Atrial Fibrillation: A Secondary Data Analysis of the Find-AF Trial. *Stroke Res Treat* 2017;2017:1391843. doi: 10.1155/2017/1391843 [published Online First: 2017/05/26]
4. Wardlaw JM, Smith EE, Biessels GJ, et al. Neuroimaging standards for research into small vessel disease and its contribution to ageing and neurodegeneration. *Lancet Neurol* 2013;12(8):822-38. doi: 10.1016/S1474-4422(13)70124-8 [published Online First: 2013/07/23]
5. Purrucker JC, Holscher K, Kollmer J, et al. Etiology of Ischemic Strokes of Patients with Atrial Fibrillation and Therapy with Anticoagulants. *J Clin Med* 2020;9(9) doi: 10.3390/jcm9092938 [published Online First: 2020/09/17]
